# Supplementary material for: The combinatorial activation of the PI3K and Ras/MAPK pathways is sufficient for aggressive tumor formation, while individual pathway activation supports cell persistence
Source: PubMed Central journal article supplement (PMC4742101; doi:10.18632/oncotarget.6159), 2015-10-19
Supplement: oncotarget-06-35231-s001.pdf [file oncotarget-06-35231-s001.pdf]

**The combinatorial activation of the PI3K and Ras/MAPK pathways is sufficient for aggressive tumor formation, while individual pathway activation supports cell persistence**

**Supplementary Material**

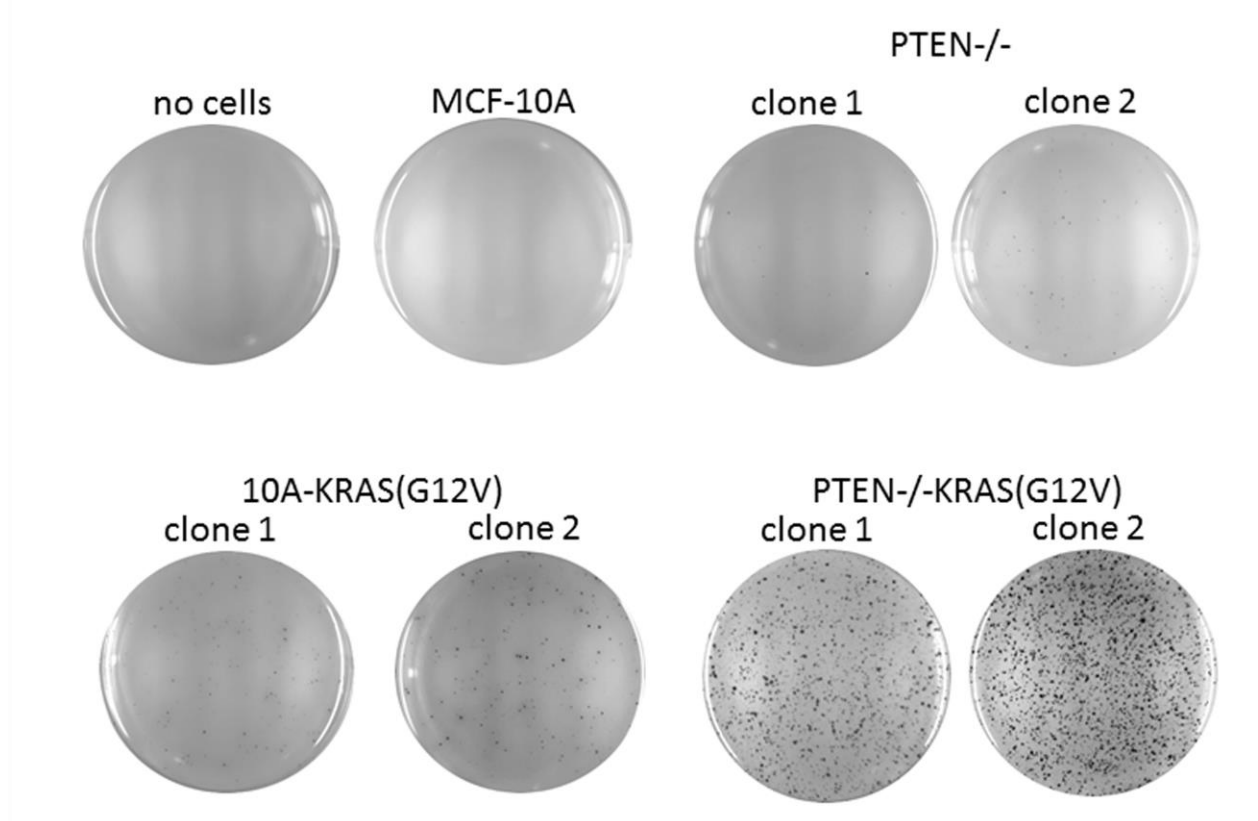

**Supplemental Figure 1: MCF-10A, PTEN<sup>-/-</sup>, 10A-KRAS(G12V) and PTEN<sup>-/-</sup>-KRAS(G12V) colony formation in soft agar.** Images for entire 6-well of colony formation in soft agar. Cells were incubated and allowed to form colonies for 12 days, then stained with 0.1% iodinitrotetrazolium chloride (Sigma, St. Louis, MO) in PBS for 24hrs.

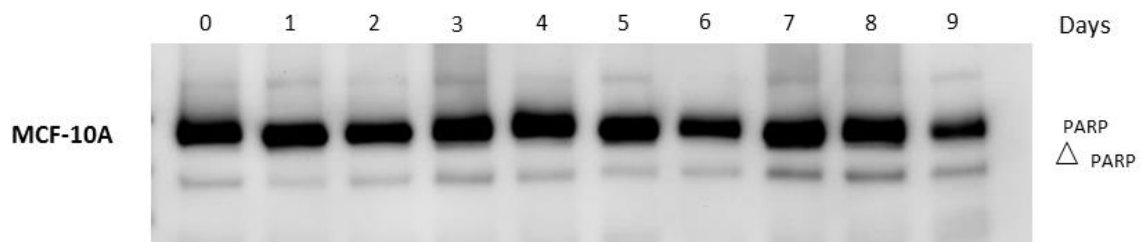

**Supplemental Figure 2: MCF-10A PARP cleavage.** Western blot analysis for PARP cleavage in MCF-10A cells plated in minimal assay media (1% charcoal dextran-stripped FBS) over time. These cells do not grow under these conditions (Fig. 1), but also do not significantly die over nine days.

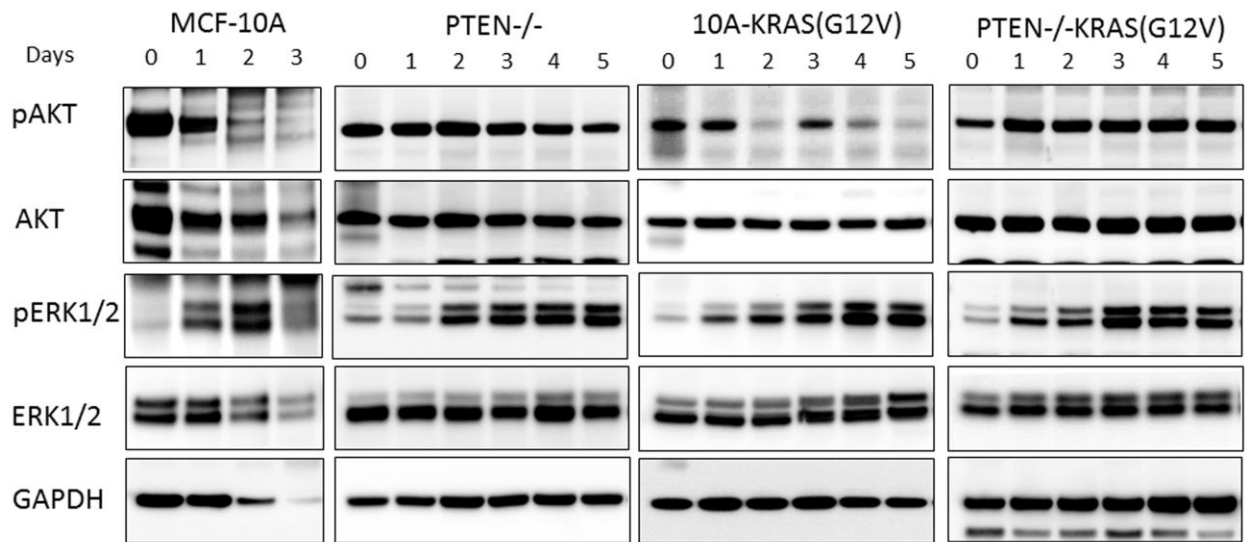

**Supplemental Figure 3: Western blot analysis of pAKT and pERK.** MCF-10A, PTEN<sup>-/-</sup>, 10A-KRAS(G12V), and PTEN<sup>-/-</sup>-KRAS(G12V) pathway activation assessed daily after suspension in serum-free media. The parental MCF-10A cells could only be taken out to 3 days due to massive cell death (Fig. 3).

### Cell cycle analysis of the PTEN<sup>-/-</sup>-KRAS(G12V) cells in suspension

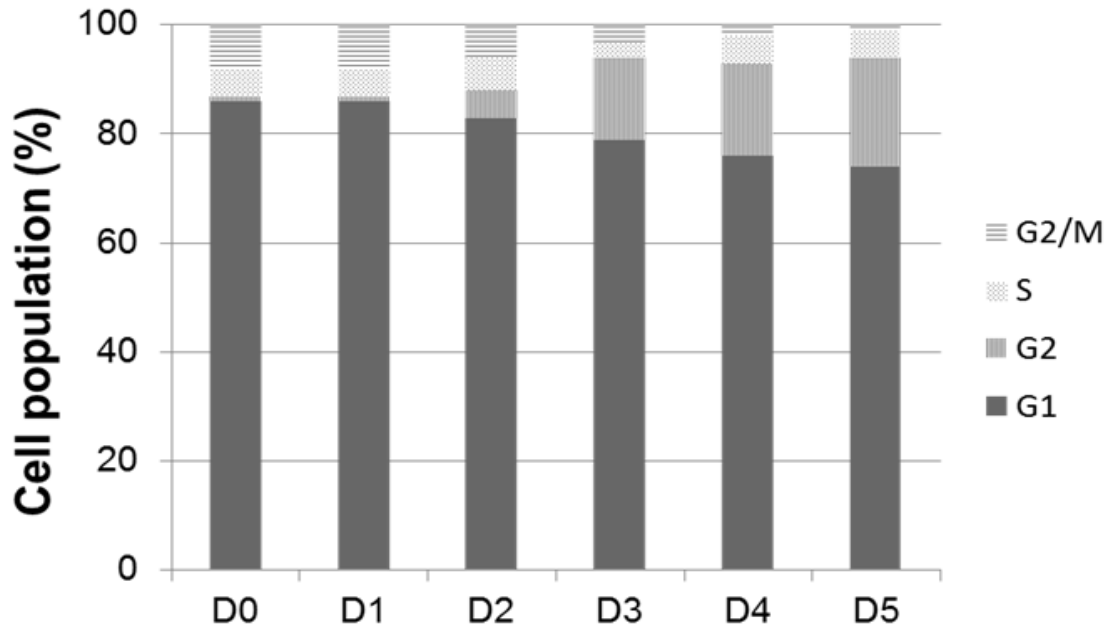

**Supplemental Figure 4: Percentage of PTEN<sup>-/-</sup>-KRAS(G12V) cell in the different phases of the cell cycle over time.** Percent of cells accumulated in the G1, G2, S-phase, and G2/M. All values are shown as mean  $\pm$  SD of triplicate samples.

## Cell Growth

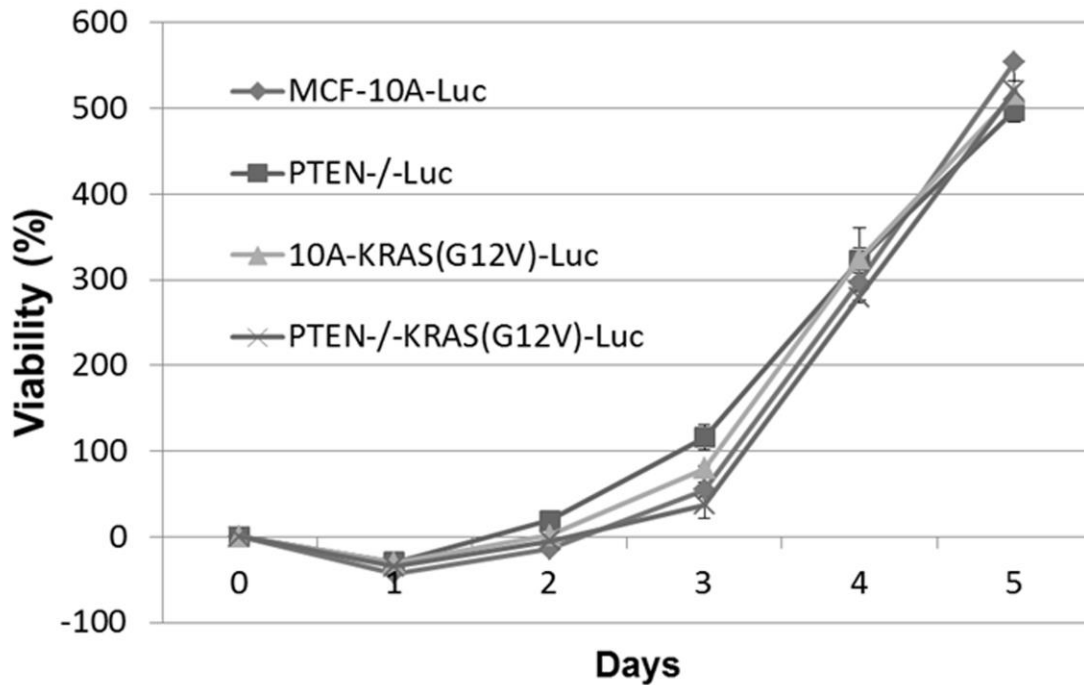

**Supplemental Figure 5: Cell growth in normal culture conditions for the luciferase expression clones.** MCF-10A-Luc, PTEN<sup>-/-</sup>-Luc, 10A-KRAS(G12V)-Luc and PTEN<sup>-/-</sup>-KRAS(G12V)-Luc were plated at equal densities ( $1 \times 10^3$  cells/well) in a 96-well plate. The CellTiter 96 assay was used as described above. All values are shown as mean  $\pm$  SD of triplicate samples.
